# Supplementary material for: Effect of Foliar Micronutrients (B, Mn, Fe, Zn) on Maize Grain Yield, Micronutrient Recovery, Uptake, and Partitioning
Source: PubMed Central journal article supplement (PMC8001809; doi:10.3390/plants10030528), 2021-03-11
Supplement: plants-10-00528-s001.pdf [file plants-10-00528-s001.pdf]

# Effect of Foliar Micronutrients (B, Mn, Fe, Zn) on Maize Grain Yield, Micronutrient Recovery, Uptake, and Partitioning

Zachary P. Stewart <sup>1,2,3,4,\*</sup>, Ellen T. Paparozzi <sup>2</sup>, Charles S. Wortmann <sup>2</sup>, Prakash Kumar Jha <sup>3</sup> and Charles A. Shapiro <sup>2,5</sup>

**Table S1.** Schedule of whole plant sampling used for uptake, partitioning, and translocation analysis at different locations.

| Sampling Date                    | 2014                   |                          |                          |                               | 2015                     |
|----------------------------------|------------------------|--------------------------|--------------------------|-------------------------------|--------------------------|
|                                  | Location 1 (Foliar B#) | Location 2 (Foliar Mn  ) | Location 3 (Foliar Zn**) | Location 4 (Foliar Fe & Zn††) | Location 5 (Foliar Fe‡‡) |
|                                  | Date (Growth Stage)    |                          |                          |                               |                          |
| Planting Date                    | April 25               | May 7                    | May 13                   | May 13                        | April 25                 |
| Diagnostic Soil and Leaf Sample‡ | June 18 (V5)           | June 18 (V5)             | June 18 (V5)             | June 18 (V5)                  | June 26 (V6)             |
| Plant Sampling 1§                | June 23 (V6)           | June 21 (V7)             | June 21 (V6)             | June 21 (V6)                  | -                        |
| Plant Sampling 2§                | July 10 (V13)          | July 11 (V15)            | July 15 (V14)            | July 14 (V14)                 | -                        |
| Plant Sampling 3§                | July 21 (V17)          | July 20 (VT)             | July 25 (V17)            | July 24 (V17)                 | -                        |
| Plant Sampling 4§                | August 5 (R2)          | August 4 (R3)            | August 7 (R2)            | August 6 (R2)                 | -                        |
| Plant Sampling 5§                | October 20 (R6)        | October 6 (R6)           | October 9 (R6)           | October 10 (R6)               | -                        |
| Harvest Date                     | November 8 (R6)        | November 7 (R6)          | November 18 (R6)         | November 9 (R6)               | November 25 (R6)         |

† All foliar treatments were applied to 9.1m x 3.05m plots (4 rows with 76.2cm spacing) with a backpack sprayer with four nozzles at a height of 0.3m above the canopy with a band width of 0.38m

‡ Initial soil and leaf samples were collected to determine if treatments were needed and which nutrient may be needed

§ Whole plant samples were collected and partitioned into leaf, stalk, reproductive, and grain where applicable.

**Table S2.** Schedule of foliar treatments† applied at various rates and times at different locations.

¶ T = Time of foliar application (1 : early (V6-11), 2: middle (V15-18), 3: 4: late (R1-4)), R = Treatment rate (rate 1: lower level of industry recommendation & rate 2: upper level of industry recommendation)

Boron rate 1: 1,000 mg kg<sup>-1</sup> or 0.14 kg B ha<sup>-1</sup> rate 2: 2,000 mg kg<sup>-1</sup> or 0.28 kg B ha<sup>-1</sup>; Manganese rate 1: 5,207 mg kg<sup>-1</sup> or 0.73 kg Mn ha<sup>-1</sup> rate 2: 10,413 mg kg<sup>-1</sup> or 1.46 kg Mn ha<sup>-1</sup>;

Zinc rate 1: 3,000 mg kg<sup>-1</sup> or 0.42 kg Zn ha<sup>-1</sup> rate 2: 6,000 mg kg<sup>-1</sup> or 0.84 kg Zn ha<sup>-1</sup>; Iron rate 1: 750 mg kg<sup>-1</sup> 0.11 kg Fe ha<sup>-1</sup> rate 2: 1500 mg kg<sup>-1</sup> 0.22 kg Fe ha<sup>-1</sup>

# 8.0% Boron derived from boric acid and contains proprietary surfactants, saccharides, and antifoaming solvents CornSorb: MAX-IN® Boron (WinField Solutions: St. Paul, MN)

| Foliar Treatment<br>(Time and Rate) | 2014                         |                              |                              |                               | 2015                          |
|-------------------------------------|------------------------------|------------------------------|------------------------------|-------------------------------|-------------------------------|
|                                     | Location 1 (Foliar B#)       | Location 2 (Foliar Mn  )     | Location 3 (Foliar Zn**)     | Location 4 (Foliar Fe & Zn++) | Location 5 (Foliar Fe‡‡)      |
|                                     | Date (Growth Stage)          |                              |                              |                               |                               |
| T1R1¶                               | July 2 (V10)                 | July 2 (V11)                 | July 8 (V11)                 | July 8 (V10)                  | June 26 (V6)                  |
| T1R2¶                               | July 2 (V10)                 | July 2 (V11)                 | July 8 (V11)                 | July 8 (V10)                  | June 26 (V6)                  |
| T2R1¶                               | July 13 (V15)                | July 13 (V18)                | July 16 (V15)                | July 16 (V15)                 | July 17 (V15)                 |
| T2R2¶                               | July 13 (V15)                | July 13 (V18)                | July 16 (V15)                | July 16 (V15)                 | July 17 (V15)                 |
| T1R1 and T2R1‡                      | July 2 (V10) & July 13 (V15) | July 2 (V11) & July 13 (V18) | July 8 (V11) & July 16 (V15) | July 8 (V10) & July 16 (V15)  | June 26 (V6) & July 17 (V15)  |
| T3R1¶                               | July 28 (R1)                 | July 26 (R2)                 | July 28 (R1)                 | July 28 (R1)                  | August 8 (R2)                 |
| T3R2¶                               | July 28 (R1)                 | July 26 (R2)                 | July 28 (R1)                 | July 28 (R1)                  | August 8 (R2)                 |
| T2R1 and T3R1¶                      | July 13 (V15) & July 28 (R1) | July 13 (V18) & July 26 (R2) | July 16 (V15) & July 28 (R1) | -                             | July 17 (V15) & August 8 (R2) |
| T4R1¶                               | -                            | -                            | -                            | August 19 (R4)                | -                             |
| T4R2¶                               | -                            | -                            | -                            | August 19 (R4)                | -                             |
| T1R1 and T4R1¶                      | -                            | -                            | -                            | July 8 (V10) & August 19 (R4) | -                             |
| T3R1 and T4R1¶                      | -                            | -                            | -                            | July 28 (R1) & August 19 (R4) | -                             |

|| 15.62% Manganese sulfate in addition to proprietary surfactants, saccharides, and antifoaming solvents CornSorb: MAX-IN® Ultra Manganese (WinField Solutions: St. Paul, MN)

\*\* 9.0% ZnEDTA (zinc-ethylenediaminetriacetate) and contains proprietary surfactants, saccharides, and antifoaming solvents CornSorb: Origin® Zinc 9% (WinField Solutions: St. Paul, MN)

++ Contains both 4.5% FeHEDTA and 9.0% ZnEDTA

‡‡ 4.5% FeHEDTA (iron-hydroxyethylenediaminetriacetate) in addition to proprietary surfactants, saccharides, and antifoaming solvents CornSorb: ULTRA-CHE IRON 4.5% HEDTA (WinField Solutions: St. Paul, MN)

**Table S3.** Summary location characteristics and results to each foliar micronutrient treatment.

| Experimental Focus. | Low-Deficient Leaf Tissue | High-Excessive Leaf Tissue | Low-Deficient Soil | Change in applied nutrient concentration due to treatment | Change in applied nutrient uptake due to treatment | Yield Response | Target Growth Stage‡ |
|---------------------|---------------------------|----------------------------|--------------------|-----------------------------------------------------------|----------------------------------------------------|----------------|----------------------|
| <b>B</b>            | ++†                       | -                          | --                 | ++                                                        | ++                                                 | 0              | Pre-V10              |
| <b>Mn</b>           | +                         | -                          | ---                | ++                                                        | ++                                                 | +              | Vegetative           |
| <b>Zn only</b>      | 0                         | +                          | ---                | ++                                                        | ++                                                 | -              | Any                  |
| <b>Fe / Zn</b>      | --/†                      | +++/-                      | ---/---            | --/++                                                     | --/++                                              | 0              | Undefined            |
| <b>Fe only</b>      | +++                       | -                          | --                 | no data                                                   | no data                                            | +++            | Any                  |

† +/0/- indicates direction of agreement with statement and number of characters indicates magnitude. (i.e. + indicates agreement and - indicates disagreement whereas 0 indicates neutral)  
 ‡ Under conditions of confirmed deficiency of the target micronutrient, the listed growth stage would be the recommended stage for foliar application of the specified micronutrient.

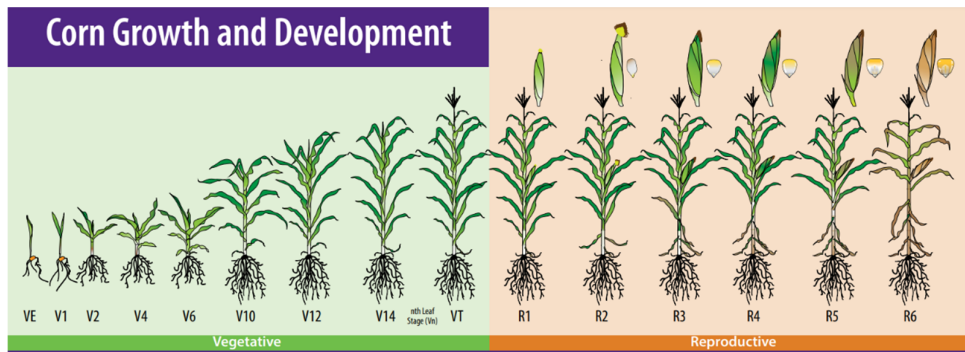

**Figure S1.** Maize growth stages (Ciampitti et al. [46]).
